# Supplementary material for: Development of machine learning models for the prediction of the skin sensitization potential of cosmetic compounds
Source: PeerJ. 2024 Dec 13;12:e18672. doi: 10.7717/peerj.18672 (PMC11648681; doi:10.7717/peerj.18672)
Supplement: Supplemental Information 5 [file peerj-12-18672-s005.xlsx]

## Sheet: Figure2A
	THBQ		DNCB		ρ-phenylenediamine		resorcinol
1000	15.1986	15.3191	19.9238	11.5516	8.96861	9.11211	58.1076	56.1435
500	18.7518	18.8014	13.3901	10.9865	10.9686	9.11211	56.3184	57.2511
250	26.5816	20.1277	10.9686	9.11211	13.3901	10.9865	59.2511	60.5067
125	29.9007	34.2837	8.76233	8.76682	39.3677	38.0718	66.1614	70.9013
62.5	47.0567	47.234	7.52466	9.19282	33.3318	43.0404	68.0224	79.0942
31.25	102.667	104.716	7.10314	7.27354	45.7982	49.0852	81.3722	84.1435
15.625	103.738	101.22	6.9148	7.21076	51.7175	67.4664	86.8072	93.1569
7.8125	117.418	103.546	6.81614	7.33184	71.287	71.9821	95.7579	98.5964
3.90625	97.3688	101.759	75.8843	71.1839	82.3408	90.0404	99.3139	80.4798
1.95312	94.844	95.9362	88.1659	97.1973	89.2601	105.731	103.314	82.4843
0.976563	95.8794	94.8298	101.587	95.0987	80.4933	99.296	86.417	87.3677
0	97.4397	98.695	112.466	102.718	100.229	98.5112	90.5067	95.8386

## Sheet: Figure2B
	2-mercaptobenzothiazole		diphenylcyclopropenone		eugenol		phenylacetaldehyde
1000	12.9148	12.1659	30.7305	33.1277	8.65248	19.4894	18.594	20.8421
500	20.7892	20.0359	30.3475	31.4681	19.5248	12.3688	21.4962	22.2782
250	24.7803	27.3318	29.3121	23.9858	13.4468	13.5816	19.4812	19.4737
125	34.1614	34.9417	28.2411	23.4184	54.7376	50.2837	17.015	17.3609
62.5	61.3812	73.444	26.5603	19.5248	96.5674	83.0993	15.7895	15.5263
31.25	63.2556	70.7399	25.3901	15.5674	89.1773	101.56	14.7669	14.7368
15.625	63.2601	73.0224	18.4255	40.305	83.9929	89.6454	74.2331	73.3083
7.8125	65.9327	76.7668	21.1631	16.9362	89.1702	87.9007	80.6165	74.6917
3.90625	77.2197	80.7937	36.7943	42.1135	94.0071	95.5106	84.7444	77.9774
1.95312	76.6099	85.722	123.56	135.468	85.9007	82.8227	85.594	84.3308
0.976563	80.2063	93.5695	95.4184	95.9291	96.1277	95.2766	84.7218	85.594
0	107.363	105.511	110.965	103.177	101.418	97.8085	100.774	93.812

## Sheet: Figure2C
	Isoeugenol		bromoml		SDS		IPA
1000	22.5338	25.6617	12.3835	12.3609	14.1809	14.2952	96.9905	96.3619
500	29.9098	23.2105	12.9173	12.3985	15.1524	16.781	91.6191	88.9333
250	27.2181	25.4962	11.9173	12.0301	15.9333	15.6381	91.0095	92.9524
125	20.0376	20.4586	12.2331	12.0752	15.5905	18.1809	92.3943	110.771
62.5	37.6165	43.6466	12.1805	11.8195	37.0381	32.0952	91.3838	93
31.25	55.3985	58.8722	12.0301	11.782	85.9333	91.0762	92.0943	92.7371
15.625	55.3684	59.015	13.2857	14.391	95.4381	98.4286	92.1791	88.8381
7.8125	66.1654	59.3534	53.2932	57.1729	90.7238	93.3905	92.0495	89.6476
3.90625	70.594	61.9023	100.406	108.767	73.0476	93.5333	90.3238	89.219
1.95312	67.2105	60.8571	97.1053	103.993	92.6381	90.6381	97.8095	92.5429
0.976563	86.2556	92.0075	97.0376	102.88	99.2381	110.076	106.609	97.981
0	86.6842	99.2481	112.158	118.248	111.581	105.057	107.6	94.1524

## Sheet: Figure2D
	gycerol		squalane		DMSO
1000	98.4286	78.6857	91.1524	95.019	91.9905	89.9048
500	93.3905	75.0381	82.019	84.4381	86.8476	87.3143
250	93.5333	75.3524	83.6857	87.1048	93.6952	91.8476
125	90.6381	91.0476	98.019	94.8381	109.695	88.0571
62.5	110.076	100.486	87.0571	86.3429	79.0571	94.5048
31.25	105.057	116.476	89.3143	81.4095	93.4762	93.7238
15.625	93.6952	91.8476	78.6857	88.8667	87.7429	100.409
7.8125	109.695	88.0571	85.0381	84.8	96.5905	94.6095
3.90625	79.0571	94.5048	85.3524	88.2476	96.1619	89.1238
1.95312	93.4762	93.7238	91.0476	117.419	96	94.5143
0.976563	87.7429	100.409	100.486	122.038	104.048	100.267
0	96.5905	94.6095	116.476	132.01	107.924	114.286
